# Supplementary material for: Exome sequencing for paediatric-onset diseases: impact of the extensive involvement of medical geneticists in the diagnostic odyssey
Source: PubMed Central journal article supplement (PMC6079040; doi:10.1038/s41525-018-0056-5), 2018-08-06
Supplement: 41525_2018_56_MOESM1_ESM.pdf [file 41525_2018_56_MOESM1_ESM.pdf]

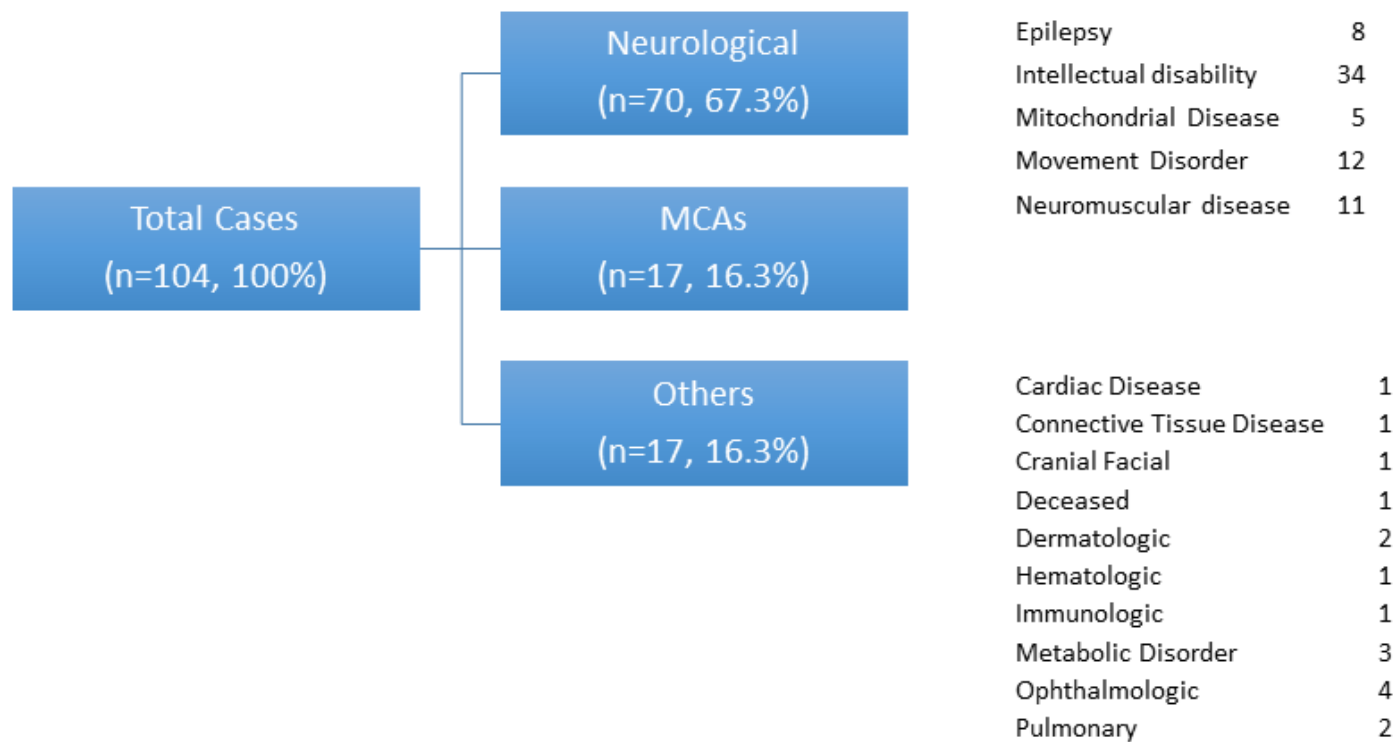

**Supplementary Figure 1. Primary clinical indications for exome sequencing.** The primary clinical indications were 1) neurological, 2) multiple congenital anomalies (MCAs) and 3) Others. Details of subcategories are listed.

## Clinical Management Categories

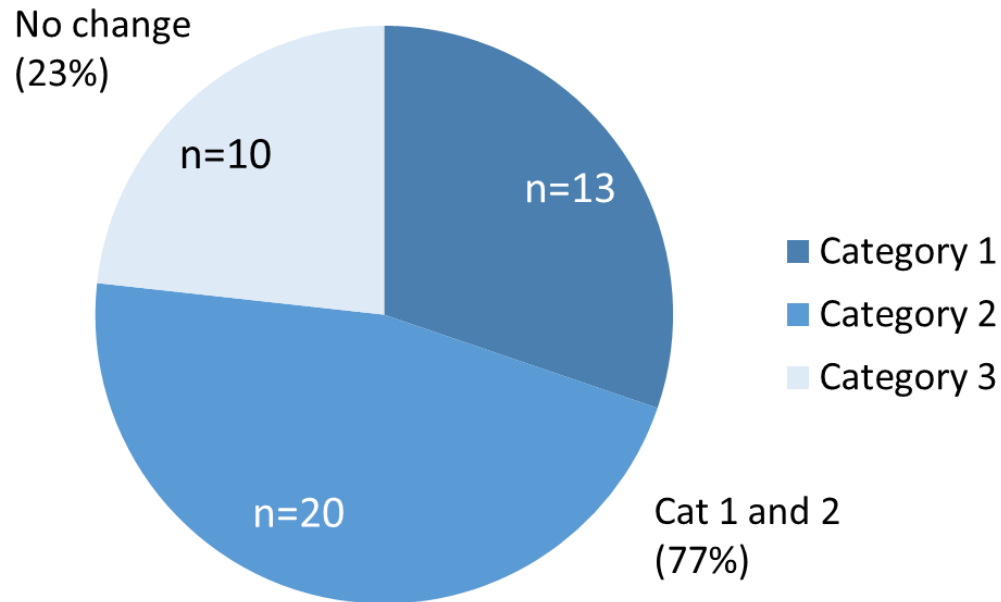

| Clinical Management Categories |                                                             |
|--------------------------------|-------------------------------------------------------------|
| Category 1                     | Disease-specific published management guidelines            |
| Category 2                     | Management based on case reports or known function of genes |
| Category 3                     | No management change                                        |

**Supplementary Figure 2. Management change categories in 43 conclusive diagnoses.** Overall, 77% of positive diagnoses aided clinical management (Categories 1 and 2).

| ID   | Self-reported Chinese | Trios vs Singleton | Self-financed vs subsidized (Group) | Laboratory | Clinical categories | Subcategory             | Confirmed Diagnosis (OMIM)                                                              |
|------|-----------------------|--------------------|-------------------------------------|------------|---------------------|-------------------------|-----------------------------------------------------------------------------------------|
| U001 | Y                     | Trios              | Group B                             | Ambry      | Neurological        | Intellectual disability | Mental retardation, X-linked 102 (OMIM #300958)                                         |
| U002 | N                     | Trios              | Group B                             | Ambry      | Other               | Ophthalmologic          |                                                                                         |
| U003 | Y                     | Trios              | Group B                             | Ambry      | Neurological        | Intellectual disability | Alpha-thalassemia/mental retardation syndrome, X-linked (OMIM #301040)                  |
| U004 | Y                     | Trios              | Group A                             | Ambry      | Neurological        | Movement Disorder       | Epilepsy, focal, with speech disorder with or without mental retardation (OMIM #245570) |
| U005 | Y                     | Trios              | Group B                             | Ambry      | Other               | Hematologic             | Fanconi anaemia, complementation group A (OMIM #227650)                                 |
| U006 | Y                     | Trios              | Group B                             | Ambry      | MCAs                |                         | Schuss-Hoeijmakers syndrome (OMIM #615009)                                              |
| U007 | Y                     | Trios              | Group B                             | Ambry      | Other               | Deceased                |                                                                                         |
| U008 | Y                     | Trios              | Group B                             | Ambry      | Other               | Immunologic             |                                                                                         |
| U009 | Y                     | Singleton          | Group A                             | Nijmegen   | Neurological        | Intellectual disability |                                                                                         |
| U010 | Y                     | Singleton          | Group A                             | Nijmegen   | Other               | Ophthalmologic          | Axenfeld-Rieger syndrome, type 3 (OMIM #602482)                                         |
| U011 | Y                     | Trios              | Group C                             | Nijmegen   | MCAs                |                         |                                                                                         |
| U012 | Y                     | Trios              | Group C                             | Nijmegen   | Neurological        | Intellectual disability | 10q26 microdeletion syndrome (OMIM #609623)                                             |
| U013 | Y                     | Singleton          | Group B                             | Nijmegen   | Neurological        | Epilepsy                |                                                                                         |
| U014 | Y                     | Trios              | Group B                             | Nijmegen   | Other               | Ophthalmologic          |                                                                                         |
| U015 | Y                     | Trios              | Group B                             | Nijmegen   | Neurological        | Intellectual disability | Coffin-Siris syndrome 1 (OMIM #135900)                                                  |
| U016 | Y                     | Singleton          | Group B                             | Nijmegen   | Neurological        | Intellectual disability |                                                                                         |
| U017 | Y                     | Trios              | Group B                             | Nijmegen   | Neurological        | Movement Disorder       | Autosomal recessive; Spastic paraplegia 11, autosomal recessive (OMIM #604360)          |
| U018 | Y                     | Singleton          | Group A                             | Nijmegen   | Neurological        | Intellectual disability |                                                                                         |
| U019 | Y                     | Singleton          | Group A                             | Nijmegen   | Neurological        | Intellectual disability |                                                                                         |
| U020 | Y                     | Singleton          | Group A                             | Nijmegen   | Neurological        | Intellectual disability |                                                                                         |
| U021 | Y                     | Singleton          | Group A                             | Nijmegen   | MCAs                |                         |                                                                                         |
| U022 | Y                     | Singleton          | Group A                             | Nijmegen   | Neurological        | Intellectual disability |                                                                                         |
| U023 | Y                     | Singleton          | Group A                             | Nijmegen   | Neurological        | Mitochondrial Disease   | Beta-ueridopropionase deficiency (OMIM #613161)                                         |
| U024 | Y                     | Singleton          | Group A                             | Nijmegen   | Neurological        | Intellectual disability |                                                                                         |
| U025 | N                     | Singleton          | Group A                             | Nijmegen   | Neurological        | Intellectual disability | Bainbridge-Ropers syndrome (OMIM# 615485)                                               |
| U026 | Y                     | Singleton          | Group A                             | Nijmegen   | MCAs                |                         |                                                                                         |
| U027 | Y                     | Singleton          | Group A                             | Nijmegen   | MCAs                |                         | Shwachman-Bodian-Diamond syndrome (OMIM #260400)                                        |
| U028 | Y                     | Singleton          | Group A                             | Nijmegen   | Neurological        | Mitochondrial Disease   | Coenzyme Q10 deficiency, primary, 7 (OMIM #616276)                                      |
| U029 | Y                     | Singleton          | Group A                             | Nijmegen   | Neurological        | Movement Disorder       |                                                                                         |
| U030 | Y                     | Trios              | Group C                             | Nijmegen   | Neurological        | Intellectual disability | Coffin-Siris syndrome 2 (OMIM # 614607)                                                 |
| U031 | Y                     | Singleton          | Group A                             | Nijmegen   | Neurological        | Epilepsy                | Hyperphosphatasia with mental retardation syndrome (HMRS) 2 (OMIM #614730)              |
| U032 | Y                     | Singleton          | Group A                             | Nijmegen   | Neurological        | Intellectual disability |                                                                                         |
| U033 | Y                     | Singleton          | Group A                             | Nijmegen   | MCAs                |                         | X-linked congenital disorder of glycosylation type Iim (OMIM #300896)                   |

**Supplementary Table 1. All 104 WES cases reported in this study.** Group A: Singleton exome subsidized by research funding; Group B: Self-financed exome (singleton or trio); Group C: Trio exome (proband singleton exome subsidized, parental exomes self-financed)

|      |   |           |         |          |              |                         |                                                                                               |
|------|---|-----------|---------|----------|--------------|-------------------------|-----------------------------------------------------------------------------------------------|
| U034 | Y | Singleton | Group A | Nijmegen | Neurological | Mitochondrial Disease   |                                                                                               |
| U035 | Y | Singleton | Group A | Nijmegen | MCA          |                         |                                                                                               |
| U036 | Y | Singleton | Group A | Nijmegen | MCA          |                         |                                                                                               |
| U037 | Y | Singleton | Group A | Nijmegen | Neurological | Movement Disorder       |                                                                                               |
| U038 | Y | Singleton | Group A | Nijmegen | MCA          |                         |                                                                                               |
| U039 | Y | Singleton | Group A | Nijmegen | Neurological | Intellectual disability | Rubinstein-Taybi syndrome type 1 (OMIM #180849)                                               |
| U040 | Y | Singleton | Group A | Nijmegen | Neurological | Intellectual disability | Bainbridge-Ropers syndrome (OMIM# 615485)                                                     |
| U041 | Y | Singleton | Group A | Nijmegen | Other        | Metabolic Disorder      |                                                                                               |
| U042 | Y | Singleton | Group A | Nijmegen | Neurological | Movement Disorder       | Early Infantile Epileptic Encephalopathy (OMIM #612164)                                       |
| U043 | Y | Singleton | Group A | Nijmegen | Neurological | Neuromuscular disease   |                                                                                               |
| U044 | Y | Singleton | Group A | Nijmegen | MCA          |                         | Noonan syndrome-like disorder with loose anagen hair 2 (OMIM #617506)                         |
| U045 | Y | Singleton | Group A | Nijmegen | MCA          |                         |                                                                                               |
| U046 | Y | Singleton | Group A | Nijmegen | Neurological | Intellectual disability |                                                                                               |
| U047 | Y | Singleton | Group A | Nijmegen | MCA          |                         |                                                                                               |
| U048 | Y | Singleton | Group A | Nijmegen | Neurological | Movement Disorder       |                                                                                               |
| U049 | N | Singleton | Group A | Nijmegen | MCA          |                         | Cutis laxa, autosomal recessive, type IID (OMIM #617403)                                      |
| U050 | Y | Singleton | Group A | Nijmegen | MCA          |                         | Lenz-Majewski hyperostotic dwarfism (LMHD) (OMIM #151050)                                     |
| U051 | Y | Singleton | Group A | Nijmegen | Neurological | Neuromuscular disease   |                                                                                               |
| U052 | N | Singleton | Group A | Nijmegen | Neurological | Movement Disorder       | Autosomal recessive agenesis of the corpus callosum with peripheral neuropathy (OMIM #218000) |
| U053 | Y | Singleton | Group A | Nijmegen | Neurological | Intellectual disability |                                                                                               |
| U054 | Y | Singleton | Group C | Nijmegen | Neurological | Neuromuscular disease   |                                                                                               |
| U055 | Y | Singleton | Group A | Nijmegen | Neurological | Movement Disorder       | Wieacker-Wolff syndrome, X-linked recessive (OMIM #314580)                                    |
| U056 | Y | Singleton | Group A | Nijmegen | Neurological | Intellectual disability |                                                                                               |
| U057 | N | Singleton | Group A | Nijmegen | Neurological | Epilepsy                |                                                                                               |
| U058 | Y | Singleton | Group A | Nijmegen | Neurological | Epilepsy                | X-linked syndromic mental retardation, Turner Type (OMIM #300706)                             |
| U059 | Y | Singleton | Group A | Nijmegen | MCA          |                         |                                                                                               |
| U060 | N | Singleton | Group A | Nijmegen | Other        | Pulmonary               |                                                                                               |
| U061 | Y | Singleton | Group A | Nijmegen | Neurological | Epilepsy                |                                                                                               |
| U062 | Y | Trios     | Group C | Nijmegen | Neurological | Intellectual disability | Neurodevelopmental disorder a.o. Rett syndrome (OMIM #312750)                                 |
| U063 | Y | Singleton | Group A | Nijmegen | Neurological | Neuromuscular disease   | Congenital megaconial muscular dystrophy (OMIM #602541)                                       |
| U064 | Y | Singleton | Group A | Nijmegen | Other        | Metabolic Disorder      |                                                                                               |
| U065 | Y | Singleton | Group A | Nijmegen | Neurological | Neuromuscular disease   |                                                                                               |
| U066 | Y | Singleton | Group A | Nijmegen | Neurological | Intellectual disability |                                                                                               |
| U067 | Y | Singleton | Group A | Nijmegen | Neurological | Epilepsy                |                                                                                               |
| U068 | Y | Singleton | Group A | Nijmegen | Neurological | Intellectual disability |                                                                                               |
| U069 | Y | Trios     | Group C | Nijmegen | Neurological | Intellectual disability | Mental retardation, autosomal dominant 31 (OMIM #616158)                                      |

**(continued) Supplementary Table 1.**

|      |   |           |         |          |              |                           |                                                                                          |
|------|---|-----------|---------|----------|--------------|---------------------------|------------------------------------------------------------------------------------------|
| U070 | Y | Singleton | Group A | Nijmegen | Neurological | Neuromuscular disease     |                                                                                          |
| U071 | Y | Singleton | Group A | Nijmegen | Other        | Connective Tissue Disease |                                                                                          |
| U072 | Y | Singleton | Group C | Nijmegen | Neurological | Intellectual disability   |                                                                                          |
| U073 | Y | Singleton | Group A | Nijmegen | Neurological | Neuromuscular disease     |                                                                                          |
| U074 | Y | Singleton | Group A | Nijmegen | MCA          |                           | Pallister-Killian syndrome (OMIM #601803)                                                |
| U075 | Y | Singleton | Group A | Nijmegen | Neurological | Intellectual disability   |                                                                                          |
| U076 | Y | Singleton | Group A | Nijmegen | Other        | Dermatologic              | Keratitichthiosis-deafness syndrome (OMIM #148210)                                       |
| U077 | Y | Singleton | Group A | Nijmegen | Neurological | Intellectual disability   |                                                                                          |
| U078 | Y | Singleton | Group A | Nijmegen | Neurological | Epilepsy                  |                                                                                          |
| U079 | Y | Singleton | Group A | Nijmegen | Other        | Ophthalmologic            |                                                                                          |
| U080 | Y | Trios     | Group C | Nijmegen | Neurological | Intellectual disability   | Mental retardation, X-linked 102 (OMIM #300958)                                          |
| U081 | Y | Trios     | Group C | Nijmegen | Neurological | Mitochondrial Disease     | Desanto-Shinawi syndrome (OMIM #616708)                                                  |
| U082 | Y | Singleton | Group A | Nijmegen | Other        | Dermatologic              |                                                                                          |
| U083 | Y | Singleton | Group A | Nijmegen | Neurological | Intellectual disability   | X-linked dominant Neurodegeneration with Brain Iron Accumulation 5, NBIA5 (OMIM #300894) |
| U084 | Y | Singleton | Group A | Nijmegen | Neurological | Neuromuscular disease     | Spinal muscular atrophy, lower extremity-predominant 1, AD (OMIM #158600)                |
| U085 | Y | Singleton | Group A | Nijmegen | Neurological | Intellectual disability   |                                                                                          |
| U086 | Y | Singleton | Group A | Nijmegen | Neurological | Intellectual disability   |                                                                                          |
| U087 | Y | Singleton | Group A | Nijmegen | Other        | Cranial Facial            | Auriculocondylar syndrome 1 (OMIM #602483)                                               |
| U088 | Y | Singleton | Group A | Nijmegen | Neurological | Intellectual disability   |                                                                                          |
| U089 | Y | Singleton | Group A | Nijmegen | Neurological | Neuromuscular disease     | Insensitivity to pain, congenital, with anhidrosis (OMIM #256800)                        |
| U090 | Y | Singleton | Group A | Nijmegen | Neurological | Mitochondrial Disease     | Costello syndrome (OMIM #218040)                                                         |
| U091 | Y | Singleton | Group A | Nijmegen | Other        | Pulmonary                 |                                                                                          |
| U092 | Y | Singleton | Group A | Nijmegen | Neurological | Neuromuscular disease     | Myasthenic syndrome, congenital, 8, with pre- and postsynaptic defects (OMIM #615120)    |
| U093 | Y | Singleton | Group A | Nijmegen | Neurological | Movement Disorder         |                                                                                          |
| U094 | Y | Trios     | Group A | Nijmegen | Other        | Cardiac Disease           |                                                                                          |
| U095 | Y | Singleton | Group A | Nijmegen | Neurological | Epilepsy                  |                                                                                          |
| U096 | Y | Singleton | Group A | Nijmegen | Other        | Metabolic Disorder        |                                                                                          |
| U097 | Y | Trios     | Group B | Nijmegen | Neurological | Movement Disorder         |                                                                                          |
| U098 | Y | Singleton | Group A | Nijmegen | Neurological | Neuromuscular disease     | Charcot-Marie-Tooth disease, axonal, type 2S (OMIM #616155)                              |
| U099 | Y | Singleton | Group A | Nijmegen | Neurological | Intellectual disability   | Nicolaides-Baraitser syndrome (OMIM #601358)                                             |
| U100 | Y | Trios     | Group B | Nijmegen | Neurological | Intellectual disability   | Mental retardation, autosomal dominant 7 (OMIM #614104)                                  |
| U101 | Y | Singleton | Group A | Nijmegen | Neurological | Movement Disorder         |                                                                                          |
| U102 | Y | Trios     | Group B | Ambry    | Neurological | Movement Disorder         | Dystonia 28, childhood-onset (OMIM #617284)                                              |
| U103 | Y | Trios     | Group B | Nijmegen | MCA          |                           | Aarskog-Scott syndrome (OMIM #305400)                                                    |
| U104 | Y | Singleton | Group A | Nijmegen | Neurological | Intellectual disability   |                                                                                          |

**(continued) Supplementary Table 1.**

| ID   | Gene Panel Variant(s)                                                                   | Exome Variant(s)                                                                                                                                                                                                                                                                                                                            |
|------|-----------------------------------------------------------------------------------------|---------------------------------------------------------------------------------------------------------------------------------------------------------------------------------------------------------------------------------------------------------------------------------------------------------------------------------------------|
| U001 | Nil                                                                                     | DDX3X; NM_001356:c.1490C>T (p.(Ala497Val))                                                                                                                                                                                                                                                                                                  |
| U002 | Nil                                                                                     | negative                                                                                                                                                                                                                                                                                                                                    |
| U003 | Nil                                                                                     | ATRX; NM_000489:c.740A>G (p.(Asn247Ser))                                                                                                                                                                                                                                                                                                    |
| U004 | Nil                                                                                     | GRIN2A; NM_000833.4:c.1841A>G (p.(Asn614Ser))                                                                                                                                                                                                                                                                                               |
| U005 | Nil                                                                                     | FANCA; NM_001286167.2:c.2941T>C (p.(Cys981Arg))                                                                                                                                                                                                                                                                                             |
| U006 | Nil                                                                                     | PACS1; NM_018026.3:c.607 C>T (p.(Arg203Trp))                                                                                                                                                                                                                                                                                                |
| U007 | Nil                                                                                     | negative                                                                                                                                                                                                                                                                                                                                    |
| U008 | Nil                                                                                     | negative                                                                                                                                                                                                                                                                                                                                    |
| U009 | negative                                                                                | negative                                                                                                                                                                                                                                                                                                                                    |
| U010 | FOXG1; Chr6(GRCh37):g.1611072C>A; NM_001453.2:c.392C>A (p.(Ser131*)); heterozygous      |                                                                                                                                                                                                                                                                                                                                             |
| U011 | negative                                                                                | negative                                                                                                                                                                                                                                                                                                                                    |
| U012 | negative                                                                                | CNV -Monosomy 10q26.2-qter                                                                                                                                                                                                                                                                                                                  |
| U013 | negative                                                                                | negative                                                                                                                                                                                                                                                                                                                                    |
| U014 | negative                                                                                | negative                                                                                                                                                                                                                                                                                                                                    |
| U015 | ARID1B; Chr6(GRCh37):g.157502101A>G; NM_020732.3:c.3136-2A>G (r.spl?) heterozygous      |                                                                                                                                                                                                                                                                                                                                             |
| U016 | negative                                                                                | negative                                                                                                                                                                                                                                                                                                                                    |
| U017 | negative                                                                                | SPG11; Chr15(GRCh37):g.44905697dup; NM_025137.3:c.3075dup (p.(Glu1026fs)); heterozygous; paternal                                                                                                                                                                                                                                           |
| U018 | negative                                                                                | SPG11; Chr15(GRCh37):g.44887457-?_44889141+?del; deletion of exon 24-26 (NM_025137.3) unknown breakpoints (HGVS: NM_025137.3:c.4002-?_4635+?del (p.?)); heterozygous; maternal                                                                                                                                                              |
| U019 | negative                                                                                | negative                                                                                                                                                                                                                                                                                                                                    |
| U020 | negative                                                                                | negative                                                                                                                                                                                                                                                                                                                                    |
| U021 | negative                                                                                | Negative                                                                                                                                                                                                                                                                                                                                    |
| U022 | negative                                                                                | negative                                                                                                                                                                                                                                                                                                                                    |
| U023 | negative                                                                                | UPB1; Chr22(GRCh37):g.24919647G>A; NM_016327.2: c.977G>A (p.Arg326Gln); homozygous                                                                                                                                                                                                                                                          |
| U024 | MECP2; ChrX(GRCh37):g.153296153G>A; NM_004992.3:c.1126C>T (p.(Pro376Ser)) heterozygous  | negative                                                                                                                                                                                                                                                                                                                                    |
| U025 | negative                                                                                | ASXL3; NM_030632.2:c.4399C>T (p.(Arg1467Ter))                                                                                                                                                                                                                                                                                               |
| U026 | FUCA1; Chr1(GRCh37):g.24192112A>T; NM_000147.4:c.393T>A (p.(Tyr131*))                   | MYH3; Chr17(GRCh37):g.10541472_10541473delinsAT; NM_002470.3:c.3616_3617delinsAT<br>SBDS; Chr7(GRCh37):g.66459273T>A; NM_016038.2:c.184A>T (p.(Lys62*)); heterozygous<br>SBDS; Chr7(GRCh37):g.66459197A>G; NM_016038.2:c.258+2T>C (r.spl?); heterozygous<br>SBDS; Chr7(GRCh37):g.66459197A>G; NM_016038.2:c.258+2T>C (r.spl?); heterozygous |
| U027 | GRIN2A; Chr16(GRCh37):g.9858774A>G; NM_000833.3:c.2627T>C (p.(Ile876Thr)); heterozygous |                                                                                                                                                                                                                                                                                                                                             |
| U028 | COQ4; Chr9(GRCh37):g.131088161G>A; NM_016035.3: c.402+1G>A (p.?); heterozygous          |                                                                                                                                                                                                                                                                                                                                             |
| U029 | COQ4; Chr9(GRCh37):g.131095146T>C; NM_016035.3: c.550T>C (p.Trp184Arg); heterozygous    |                                                                                                                                                                                                                                                                                                                                             |
| U029 | SPAST; Chr2(GRCh37):g.32341228T>G; NM_014946.3:c.1045T>G (p.(Leu349Val)); heterozygous  |                                                                                                                                                                                                                                                                                                                                             |
| U030 | SPAST; Chr2(GRCh37):g.32379538C>G; NM_014946.3:c.1824C>G (p.(Asn608Lys)); heterozygous  | negative                                                                                                                                                                                                                                                                                                                                    |
| U030 | ARID1A; Chr1(GRCh37):g.27097817G>A; NM_006015.4:c.3406G>A (p.(Ala1136Thr)) heterozygous |                                                                                                                                                                                                                                                                                                                                             |
| U031 | PIGO; Chr9(GRCh37):g.35091693; NM_032634.3:c.2191del (p.(Arg731fs)) heterozygous        |                                                                                                                                                                                                                                                                                                                                             |
| U031 | PIGO; Chr9(GRCh37):g.35095105; NM_032634.3:c.458T>C (p.Phe153Ser)) heterozygous         |                                                                                                                                                                                                                                                                                                                                             |
| U032 | negative                                                                                | negative                                                                                                                                                                                                                                                                                                                                    |
| U033 | SLC35A2; ChrX(GRCh37):g.48762617dup; NM_005660.1:c.569dup (p.(Gly191fs)) heterozygous   |                                                                                                                                                                                                                                                                                                                                             |

(continued) Supplementary Table 1.

|      |                                                                                                                                                                                                                                                                                |                                                                                                                                                                               |
|------|--------------------------------------------------------------------------------------------------------------------------------------------------------------------------------------------------------------------------------------------------------------------------------|-------------------------------------------------------------------------------------------------------------------------------------------------------------------------------|
| U034 | negative                                                                                                                                                                                                                                                                       | negative                                                                                                                                                                      |
| U035 | negative                                                                                                                                                                                                                                                                       | negative                                                                                                                                                                      |
| U036 | negative                                                                                                                                                                                                                                                                       | MN1                                                                                                                                                                           |
| U037 | SPG7; Chr16(GRCh37):g.89614409_89614410del; NM_003119.3:c.1553-2_1553-1del (r.spl?) heterozygous<br>FLNA; ChrX(GRCh37):g.153588198T>G; NM_001110556.1:c.3881A>C (p.(Lys1294Thr)); heterozygous                                                                                 | CAMTA1; Chr1(GRCh37):g.7723649C>G; NM_015215.3: c.1042C>G (p.(Gln348Glu)); heterozygous                                                                                       |
| U038 | RET; Chr10(GRCh37):g.43600607C>A; NM_020975.4:c.833C>A (p.(Thr278Asn)); heterozygous                                                                                                                                                                                           | negative                                                                                                                                                                      |
| U039 | CREBBP; Chr16(GRCh37):g.3789726C>A; NM_004380.2:c.4134-1G>T (r.spl?) heterozygous                                                                                                                                                                                              | NF1; Chr17(GRCh37):g.29556972_29556974del; NM_001042492.2:c.2970_2972del; p.Met992del.                                                                                        |
| U040 | ASXL3; Chr18(GRCh37):g.31318745_31318746del; NM_030632.1:c.1377_1378del (p.(Glu459fs));heterozygous                                                                                                                                                                            |                                                                                                                                                                               |
| U041 | negative                                                                                                                                                                                                                                                                       | negative                                                                                                                                                                      |
| U042 | negative                                                                                                                                                                                                                                                                       | STXBP1; Chr9(GRCh37):g.130438134C>T; NM_003165.3:c.1162C>T (p.(Arg388*)) heterozygous                                                                                         |
| U043 | MYH3;Chr17:10541426_10541428del; NM_002470.3:c.3661_3663del (p.(Glu1221del)) heterozygous                                                                                                                                                                                      | negative                                                                                                                                                                      |
| U044 | (not included)                                                                                                                                                                                                                                                                 | negative                                                                                                                                                                      |
| U045 | negative                                                                                                                                                                                                                                                                       | negative                                                                                                                                                                      |
| U046 | negative                                                                                                                                                                                                                                                                       | negative                                                                                                                                                                      |
| U047 | negative                                                                                                                                                                                                                                                                       | negative                                                                                                                                                                      |
| U048 | SCN8A; Chr12(GRCh37):g.52056654C>A; NM_014191.3:c.53C>A (p.(Thr18Asn)) heterozygous                                                                                                                                                                                            | negative                                                                                                                                                                      |
| U049 | ATP6V1A:NM_001690.3:c.215G>A<br>FAT4:NM_024582.4:c.11501C>T                                                                                                                                                                                                                    |                                                                                                                                                                               |
| U050 | PTDSS1; Chr8(GRCh37):g.97316346G>T; NM_014754.1:c.831G>T (p.(Trp277Cys)); heterozygous<br>COL6A2; Chr21(GRCh37):g.47540454G>A; NM_001849.3:c.1358G>A (p.(Arg453His)); heterozygous<br>COL6A2; Chr21(GRCh37):g.47544599G>A; NM_001849.3:c.1706G>A (p.(Arg569Gln)); heterozygous |                                                                                                                                                                               |
| U051 | COL6A2; Chr21(GRCh37):g.47552409C>A; NM_001849.3: c.3003C>A (p.(Asp1001Glu)); heterozygous                                                                                                                                                                                     | Exome negative                                                                                                                                                                |
| U052 | negative                                                                                                                                                                                                                                                                       | SLC12A6; NM_133647.1: c.3031C>T (p.(Arg1011*)); homozygous                                                                                                                    |
| U053 | negative                                                                                                                                                                                                                                                                       | negative                                                                                                                                                                      |
| U054 | negative                                                                                                                                                                                                                                                                       | negative                                                                                                                                                                      |
| U055 | negative                                                                                                                                                                                                                                                                       | ZC4H2; NM_018684.2: c.593G>A, p.Arg198Gln                                                                                                                                     |
| U056 | negative                                                                                                                                                                                                                                                                       | negative                                                                                                                                                                      |
| U057 | negative                                                                                                                                                                                                                                                                       | negative                                                                                                                                                                      |
| U058 | negative                                                                                                                                                                                                                                                                       | HUWE1; ChrX(GRCh37):g.53631677C>T; NM_031407.6:c.2615G>A (p.(Arg872Gln)) hemizygous<br>CACNA1H; Chr16(GRCh37):g.1245967C>T; NM_021098.2:c.587C>T (p.(Ser196Leu)) heterozygous |
| U059 | negative                                                                                                                                                                                                                                                                       | negative                                                                                                                                                                      |
| U060 | negative                                                                                                                                                                                                                                                                       | negative                                                                                                                                                                      |
| U061 | negative                                                                                                                                                                                                                                                                       | FSCN2; NM_001077182.2:c.673G>T (p.(Asp225Tyr)) heterozygous                                                                                                                   |
| U062 | MECP2; ChrX(GRCh37):g.153296777G>A; NM_001110792.1:c.538C>T (p.(Arg180*)) heterozygous, de novo                                                                                                                                                                                |                                                                                                                                                                               |
| U063 | CHKB; NM_005198.4:c.598del (p.(Gln200fs)) homozygous                                                                                                                                                                                                                           |                                                                                                                                                                               |
| U064 | negative                                                                                                                                                                                                                                                                       | negative                                                                                                                                                                      |
| U065 | negative                                                                                                                                                                                                                                                                       | negative                                                                                                                                                                      |
| U066 | Negative                                                                                                                                                                                                                                                                       | MFN2; Chr1(GRCh37):g.12058934C>T; NM_014874.3:c.707C>T (p.(Thr236Met)); heterozygous                                                                                          |
| U067 | negative                                                                                                                                                                                                                                                                       | negative                                                                                                                                                                      |
| U068 | CSNK2A1; Chr20(GRCh37):g.472926T>C; NM_177559.2:c.593A>G (p.(Lys198Arg)) heterozygous                                                                                                                                                                                          |                                                                                                                                                                               |
| U069 | PURA; Chr5(GRCh37):g.139494073_139494074del; NM_005859.4:c.307_308del (p.(Ser103fs)) heterozygous, de novo                                                                                                                                                                     | not performed                                                                                                                                                                 |

**(continued) Supplementary Table 1.**

|      |                                                                                                        |                                                                                                        |
|------|--------------------------------------------------------------------------------------------------------|--------------------------------------------------------------------------------------------------------|
| U070 | Negative                                                                                               | GJB2; Chr13(GRCh37):g.20763612C>T; NM_004004.5:c.109G>A (p.(Val37Ile)) homozygous                      |
| U071 | Negative                                                                                               | RYR1; Chr19(GRCh37):g.38959977C>G; NM_000540.2:c.3589C>G (p.(Gln1197Glu)) heterozygous                 |
| U072 | negative                                                                                               | Negative                                                                                               |
| U073 | negative                                                                                               | TGM6; NM_198994.2:c.1528G>C; p.510H                                                                    |
| U074 | negative                                                                                               | negative                                                                                               |
| U075 | negative                                                                                               | CNV -dup(12)(pterp11.1)                                                                                |
| U076 | NM_004004.5:c.148G>A (p.(Asp50Asn)) heterozygous                                                       | negative                                                                                               |
| U077 | negative                                                                                               | not performed                                                                                          |
| U078 | negative                                                                                               | negative                                                                                               |
| U079 | negative                                                                                               | negative                                                                                               |
| U080 | DDX3X; ChrX(GRCh37):g.41205628del; NM_001356.4:c.1462del (p.(Arg488fs)); heterozygous, de novo         | not performed                                                                                          |
| U081 | negative                                                                                               | WAC; Chr10(GRCh37):g.28899633dupA; NM_016628.4: c.1171dupA (p.(Thr391Asnfs*15)); heterozygous; DE NOVO |
| U082 | FLG; Chr1(GRCh37):g.152275298T>A; NM_002016.1:c.12064A>T; p.(Lys4022*); HETEROZYGOUS                   |                                                                                                        |
| U083 | WDR45; ChrX(GRCh37):g.48934399C>T; NM_007075.3:c.249G>A (p.(Trp83*)); heterozygous                     |                                                                                                        |
| U084 | DYNC1H1; Chr14(GRCh37):g.102446288C>T; NM_001376.4:c.751C>T (p.(Arg251Cys)) heterozygous               |                                                                                                        |
| U085 | RYR1; Chr19(GRCh37):g.38954087C>T; NM_000540.2:c.2602C>T (p.(Arg868Cys)) heterozygous                  | not performed                                                                                          |
| U086 | BICD2; Chr9(GRCh37):g.95526894C>G; NM_001003800.1:c.133G>C (p.(Glu45Gln)) heterozygous                 | ZMYM3; ChrX(GRCh37):g.70465837G>A; NM_005096.3:c.2684C>T(p.(Pro895Leu))                                |
| U087 | TAF1:c.2482C>G (p.(Leu828Val)); hemizygous                                                             |                                                                                                        |
| U088 | GNAI3; Chr1(GRCh37):g.110116380G>A; NM_006496.3:c.140G>A (p.(Ser47Asn)) heterozygous.                  |                                                                                                        |
| U089 | CDKL5; ChrX(GRCh37):g.18622260_18622262del; NM_001037343.1:c.1216_1218del (p.(Leu406del)) heterozygous |                                                                                                        |
| U090 | NTRK1:NM_002529.3:c.744del                                                                             |                                                                                                        |
| U091 | NTRK1:NM_002529.3:c.2089G>A                                                                            |                                                                                                        |
| U092 | HRAS; Chr11(GRCh37):g.533467C>G; NM_005343.2:c.436G>C (p.(Ala146Pro)); heterozygous                    |                                                                                                        |
| U093 | negative                                                                                               | negative                                                                                               |
| U094 | negative                                                                                               | negative                                                                                               |
| U095 | negative                                                                                               | OLIG1; Chr21(GRCh37):g.34442554T>G; NM_138983.2:c.2T>G (p.(Met1?)) heterozygous                        |
| U096 | negative                                                                                               | FLNA; ChrX(GRCh37):g.15358001G>A; NM_001110556.1:c.6971C>T (p.(Pro2324Leu)); hemizygous                |
| U097 | negative                                                                                               | XPNPEP2; ChrX(GRCh37):g.128876157del; NM_003399.5:c.123del (p.(Tyr42Thrfs*37)); hemizygous             |
| U098 | IGHMBP2; Chr11(GRCh37):g.68704304del; NM_002180.2:c.2356del (p.(Ala786fs)) heterozygous                | negative                                                                                               |
| U099 | SYT2; Chr1(GRCh37):g.202569556G>C; NM_177402.4:c.848C>G (p.(Thr283Arg)) heterozygous                   | ABCB11; Chr2(GRCh37):g.169783855G>C; NM_003742.2:c.3429C>G (p.(Asp1143Glu)); heterozygous              |
| U100 | SMARCA2; Chr9(GRCh37):g.2110344C>A; NM_003070.4:c.3383C>A (p.(Ala1128Asp)) heterozygous, de novo       | ABCB11; Chr2(GRCh37):g.169801131G>A; NM_003742.2:c.2594C>T (p.(Ala865Val)); heterozygous               |
| U101 | SMARCA2; Chr9(GRCh37):g.2110355G>C; NM_003070.4:c.3394G>C (p.(Gly1132Arg)) heterozygous, de novo       | negative                                                                                               |
| U102 | DYRK1A; Chr21(GRCh37):g.38877628G>T; NM_001396.3:c.1282G>T (p.(Gly428*)); heterozygous, de novo        |                                                                                                        |
| U103 | negative                                                                                               | KMT2B; NM_014727:c.2425C>T (p.(Q809*))                                                                 |
| U104 | negative                                                                                               | negative                                                                                               |

(continued) Supplementary Table 1.



| <b>ID</b> | <b>Laboratory Case level classification</b> | <b>After Segregation</b> | <b>Clinical geneticist clinical-level classification</b> | <b>&gt;3Hrs to Review</b> |
|-----------|---------------------------------------------|--------------------------|----------------------------------------------------------|---------------------------|
| U001      | Negative                                    | Negative                 | Definitive                                               |                           |
| U002      | Negative                                    | Negative                 | Negative                                                 |                           |
| U003      | Possible                                    | Possible                 | Definitive                                               |                           |
| U004      | Definitive                                  | Definitive               | Definitive                                               |                           |
| U005      | Definitive                                  | Definitive               | Definitive                                               |                           |
| U006      | Definitive                                  | Definitive               | Definitive                                               |                           |
| U007      | Negative                                    | Negative                 | Negative                                                 |                           |
| U008      | Negative                                    | Negative                 | Negative                                                 |                           |
| U009      | Negative                                    | Negative                 | Negative                                                 |                           |
| U010      | Definitive                                  | Definitive               | Definitive                                               |                           |
| U011      | Negative                                    | Negative                 | Negative                                                 |                           |
| U012      | Negative                                    | Negative                 | Definitive                                               |                           |
| U013      | Negative                                    | Negative                 | Negative                                                 |                           |
| U014      | Negative                                    | Negative                 | Negative                                                 |                           |
| U015      | Definitive                                  | Definitive               | Definitive                                               |                           |
| U016      | Negative                                    | Negative                 | Negative                                                 |                           |
| U017      | Definitive                                  | Definitive               | Definitive                                               |                           |
| U018      | Negative                                    | Negative                 | Negative                                                 |                           |
| U019      | Negative                                    | Negative                 | Negative                                                 |                           |
| U020      | Negative                                    | Negative                 | Negative                                                 |                           |
| U021      | Negative                                    | Negative                 | Negative                                                 |                           |
| U022      | Negative                                    | Negative                 | Negative                                                 |                           |
| U023      | Candidate                                   | Candidate                | Definitive                                               | Yes                       |
| U024      | Possible                                    | Possible                 | Unlikely                                                 | Yes                       |
| U025      | Negative                                    | Negative                 | Definitive                                               | Yes                       |
| U026      | Possible                                    | Unlikely                 | Unlikely                                                 | Yes                       |
| U027      | Candidate                                   | Candidate                | Definitive                                               | Yes                       |
| U028      | Possible                                    | Possible                 | Definitive                                               | Yes                       |
| U029      | Candidate                                   | Candidate                | Unlikely                                                 | Yes                       |
| U030      | Candidate                                   | Candidate                | Definitive                                               |                           |
| U031      | Possible                                    | Possible                 | Definitive                                               | Yes                       |
| U032      | Negative                                    | Negative                 | Negative                                                 |                           |
| U033      | Possible                                    | Possible                 | Definitive                                               | Yes                       |

**(continued) Supplementary Table 1.**

|      |            |            |            |     |
|------|------------|------------|------------|-----|
| U034 | Negative   | Negative   | Negative   |     |
| U035 | Negative   | Negative   | Negative   |     |
| U036 | Candidate  | Candidate  | Candidate  | Yes |
| U037 | Candidate  | Candidate  | Candidate  | Yes |
| U038 | Negative   | Negative   | Negative   |     |
| U039 | Possible   | Possible   | Definitive | Yes |
| U040 | Possible   | Definitive | Definitive |     |
| U041 | Negative   | Negative   | Negative   |     |
| U042 | Definitive | Definitive | Definitive |     |
| U043 | Possible   | Unlikely   | Unlikely   | Yes |
| U044 | Negative   | Negative   | Definitive | Yes |
| U045 | Negative   | Negative   | Negative   |     |
| U046 | Negative   | Negative   | Negative   |     |
| U047 | Negative   | Negative   | Negative   |     |
| U048 | Candidate  | Unlikely   | Unlikely   |     |
| U049 | Candidate  | Candidate  | Definitive | Yes |
| U050 | Possible   | Definitive | Definitive |     |
| U051 | Candidate  | Candidate  | Unlikely   | Yes |
| U052 | Definitive | Definitive | Definitive |     |
| U053 | Negative   | Negative   | Negative   |     |
| U054 | Negative   | Negative   | Negative   |     |
| U055 | Definitive | Definitive | Definitive |     |
| U056 | Negative   | Negative   | Negative   |     |
| U057 | Negative   | Negative   | Negative   |     |
| U058 | Candidate  | Candidate  | Likely     | Yes |
| U059 | Negative   | Negative   | Negative   |     |
| U060 | Negative   | Negative   | Negative   |     |
| U061 | Candidate  | Unlikely   | Unlikely   | Yes |
| U062 | Definitive | Definitive | Definitive |     |
| U063 | Definitive | Definitive | Definitive |     |
| U064 | Negative   | Negative   | Negative   |     |
| U065 | Negative   | Negative   | Negative   |     |
| U066 | Possible   | Unlikely   | Unlikely   |     |
| U067 | Negative   | Negative   | Negative   |     |
| U068 | Candidate  | Candidate  | Definitive | Yes |
| U069 | Definitive | Definitive | Definitive |     |

**(continued) Supplementary Table 1.**

|      |            |            |            |     |
|------|------------|------------|------------|-----|
| U070 | Possible   | Possible   | Unlikely   | Yes |
| U071 | Negative   | Negative   | Negative   |     |
| U072 | Negative   | Negative   | Negative   | Yes |
| U073 | Negative   | Negative   | Negative   |     |
| U074 | Negative   | Negative   | Definitive |     |
| U075 | Negative   | Negative   | Negative   |     |
| U076 | Definitive | Definitive | Definitive | Yes |
| U077 | Negative   | Negative   | Negative   |     |
| U078 | Negative   | Negative   | Negative   |     |
| U079 | Negative   | Negative   | Negative   |     |
| U080 | Definitive | Definitive | Definitive |     |
| U081 | Definitive | Definitive | Definitive |     |
| U082 | Candidate  | Candidate  | Candidate  | Yes |
| U083 | Candidate  | Definitive | Definitive |     |
| U084 | Definitive | Definitive | Definitive |     |
| U085 | Candidate  | Candidate  | Candidate  |     |
| U086 | Possible   | Possible   | Unlikely   | Yes |
| U087 | Definitive | Definitive | Definitive |     |
| U088 | Candidate  | Unlikely   | Unlikely   |     |
| U089 | Definitive | Definitive | Definitive |     |
| U090 | Definitive | Definitive | Definitive |     |
| U091 | Negative   | Negative   | Negative   |     |
| U092 | Definitive | Definitive | Definitive |     |
| U093 | Candidate  | Candidate  | Candidate  |     |
| U094 | Candidate  | Candidate  | Candidate  | Yes |
| U095 | Negative   | Negative   | Negative   |     |
| U096 | Possible   | Possible   | Unlikely   |     |
| U097 | Negative   | Negative   | Negative   |     |
| U098 | Candidate  | Candidate  | Definitive | Yes |
| U099 | Possible   | Definitive | Definitive |     |
| U100 | Definitive | Definitive | Definitive |     |
| U101 | Negative   | Negative   | Negative   |     |
| U102 | Definitive | Definitive | Definitive |     |
| U103 | Negative   | Negative   | Definitive | Yes |
| U104 | Negative   | Negative   | Negative   |     |

**(continued) Supplementary Table 1.**

| Management interventions | Description                                                                                                                                           |
|--------------------------|-------------------------------------------------------------------------------------------------------------------------------------------------------|
| R                        | referral to a specialist (at least one time) for management of potential complication(s) associated with genetic variant                              |
| D                        | diagnostic testing (e.g. lab tests, echo and other imaging) indicated to evaluate possible complications that would not otherwise have been suspected |
| P                        | surgical/interventional procedure may result or be contraindicated                                                                                    |
| S                        | surveillance (recurrent) for potential complication(s) associated with genetic variant (e.g. medical exam or diagnostic imaging)                      |
| M                        | medication to treat some aspect of the condition (either to consider prescribing or medication might be contraindicated)                              |
| L                        | lifestyle changes to mitigate some risk of the condition                                                                                              |
| O                        | other                                                                                                                                                 |

**Supplementary Table 2. Types of management interventions by Riggs et al.**

Management implications for each positive diagnosis were categorized into one of seven categories, provided as supplementary details to Table 3.
